# Supplementary material for: Characterization of the Recombinant Exopeptidases PepX and PepN from Lactobacillus helveticus ATCC 12046 Important for Food Protein Hydrolysis
Source: PubMed Central journal article supplement (PMC3716637; doi:10.1371/journal.pone.0070055), 2013-07-19

**Figure S1** Automated purification of recombinant PepX using Ni<sup>2+</sup>-affinity chromatography (A) and desalting (B). The purified and desalted PepX is hatched.

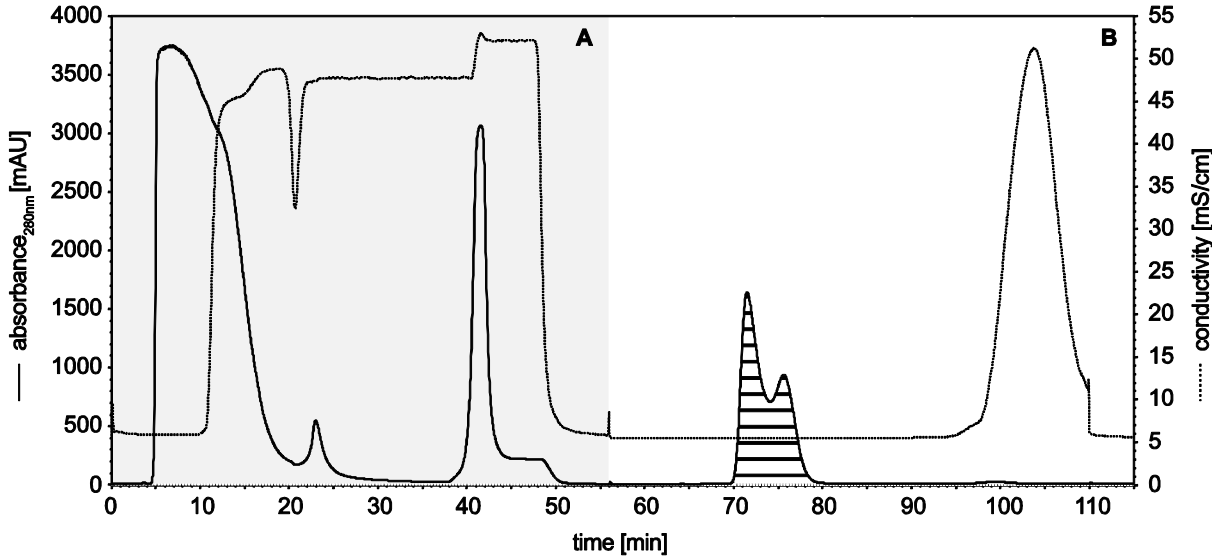

Supplement: pone.0070055.s001.pdf [file pone.0070055.s001.pdf]
